# Supplementary material for: On the diatropic perimeter of iterated altan-molecules
Source: Royal Society of Chemistry journal article supplement (doi:10.1039/c5cp05520b), 2015-01-01
Supplement: c5cp05520b1.pdf [file c5cp05520b1.pdf]

## On the diatropic perimeter of iterated *altan*-molecules

G. Monaco

### Electronic Supporting Information

**Figure ESI1.** Orbital energy levels for *altan*<sup>2</sup>-[10]annulene. In order to compare the HLPm energies with the ab initio ones, the  $\beta$  parameter has been estimated as 0.2377 au, matching the HOMO-LUMO gap of benzene ( $2\beta$ ) to the value computed at the HF/6-31G\*\*//B3LYP/6-31G\* level (0.47543 au).

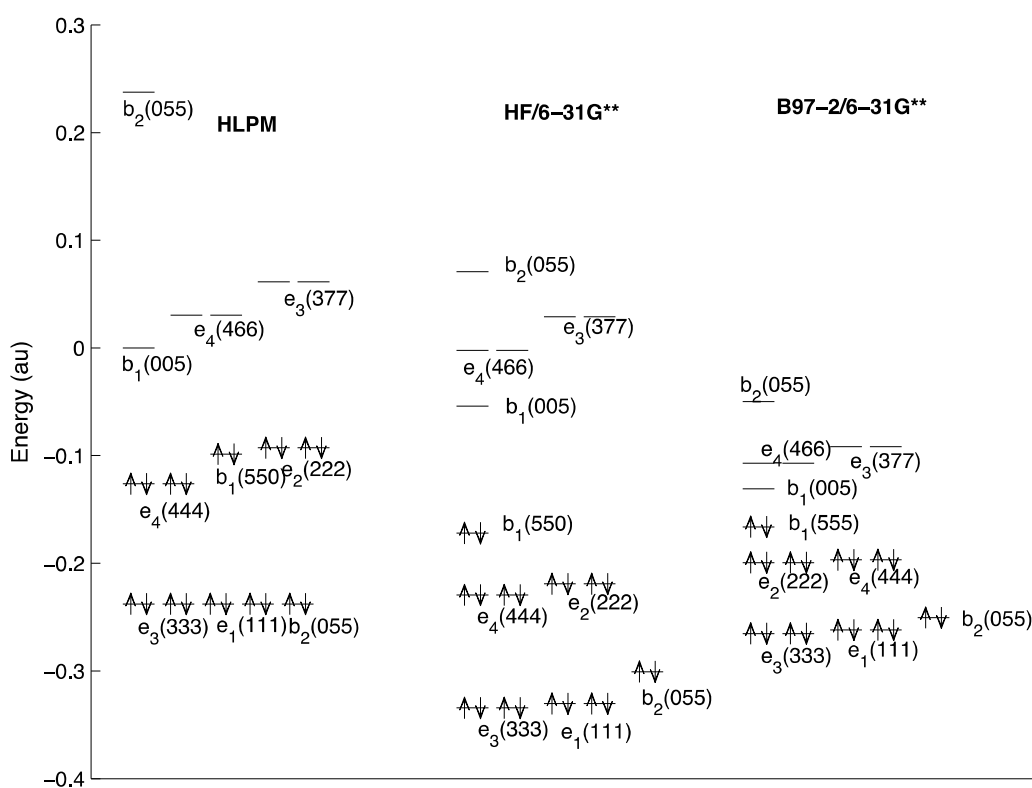

**Figure ES12.** Orbital energy levels for *altan*-kekulene. In order to compare the HLP energies with the ab initio ones, the  $\beta$  parameter has been estimated as 0.2377 au, matching the HOMO-LUMO gap of benzene ( $2\beta$ ) to the value computed at the HF/6-31G\*\*//B3LYP/6-31G\* level (0.47543 au).

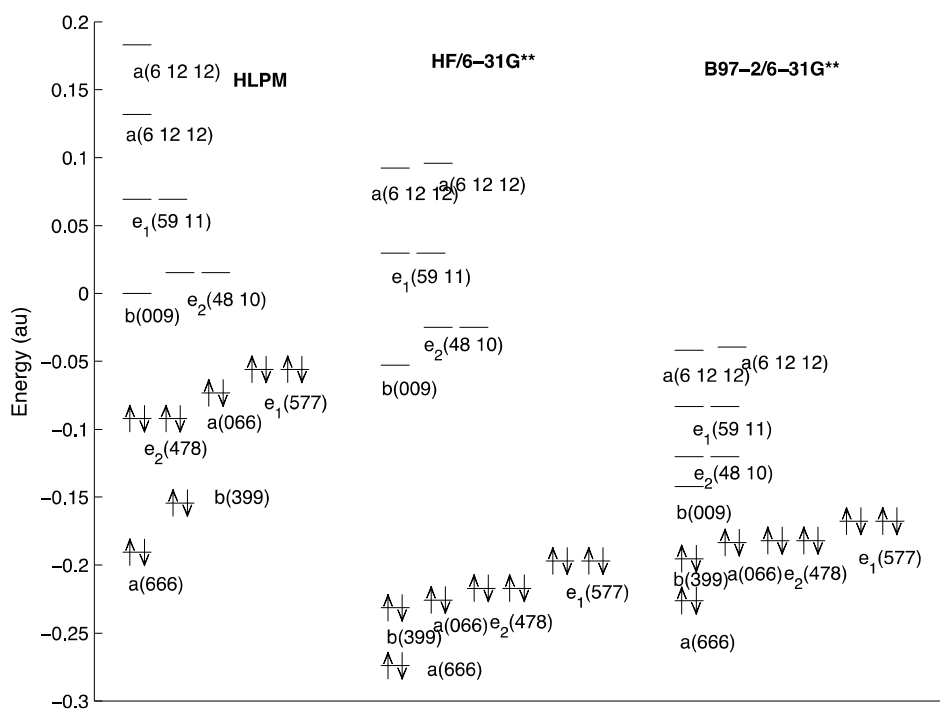

### Full reference 18

M. J. Frisch, G. W. Trucks, H. B. Schlegel, G. E. Scuseria, M. A. Robb, J. R. Cheeseman, G. Scalmani, V. Barone, B. Mennucci, G. A. Petersson, H. Nakatsuji, M. Caricato, X. Li, H. P. Hratchian, A. F. Izmaylov, J. Bloino, G. Zheng, J. L. Sonnenberg, M. Hada, M. Ehara, K. Toyota, R. Fukuda, J. Hasegawa, M. Ishida, T. Nakajima, Y. Honda, O. Kitao, H. Nakai, T. Vreven, J. A. Montgomery, Jr., J. E. Peralta, F. Ogliaro, M. Bearpark, J. J. Heyd, E. Brothers, K. N. Kudin, V. N. Staroverov, R. Kobayashi, J. Normand, K. Raghavachari, A. Rendell, J. C. Burant, S. S. Iyengar, J. Tomasi, M. Cossi, N. Rega, J. M. Millam, M. Klene, J. E. Knox, J. B. Cross, V. Bakken, C. Adamo, J. Jaramillo, R. Gomperts, R. E. Stratmann, O. Yazyev, A. J. Austin, R. Cammi, C. Pomelli, J. W. Ochterski, R. L. Martin, K. Morokuma, V. G. Zakrzewski, G. A. Voth, P. Salvador, J. J. Dannenberg, S. Dapprich, A. D. Daniels, . Farkas, J. B. Foresman, J. V. Ortiz, J. Cioslowski and D. J. Fox, Gaussian 09 Revision D.01, Gaussian Inc. Wallingford CT 2009.

**Figure ESI3.** Frontier orbitals of *altan*<sup>2</sup>-[10]annulene at the UB3LYP/6-31G\* level

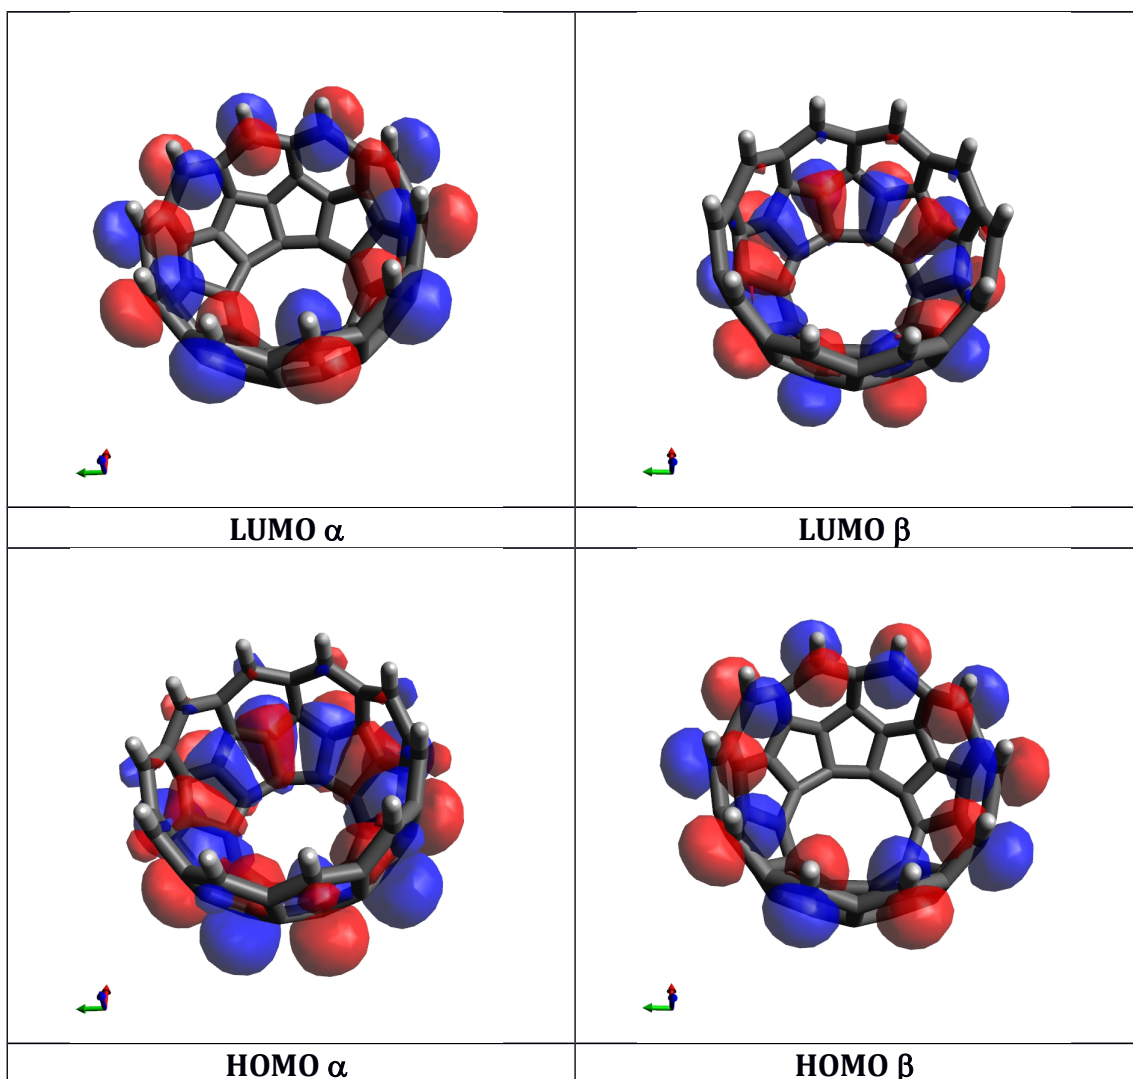

**Figure ESI4.** Frontier orbitals of *altan*-kekulene at the UB3LYP/6-31G\* level

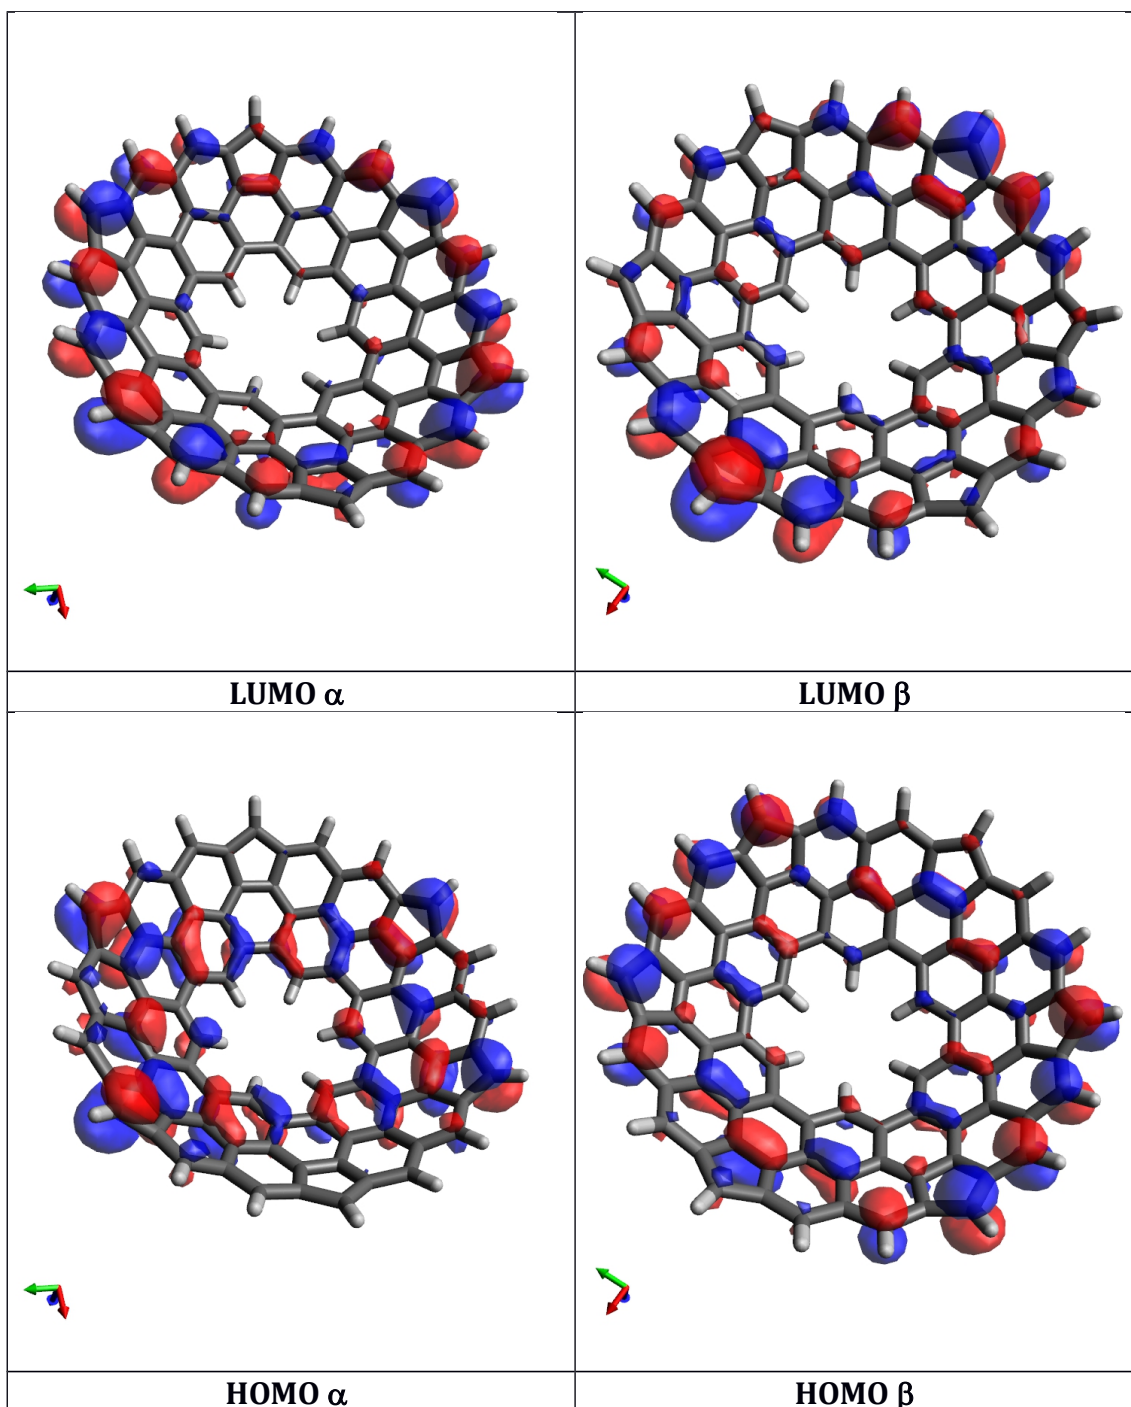

**Table ESI1.** Absolute values of the energies discussed in the paper and Natural Orbital Occupation Numbers (NOONs).

| Species   | Method                               | Job             | Symm      | Energy (au)   | NOONs                                                     |
|-----------|--------------------------------------|-----------------|-----------|---------------|-----------------------------------------------------------|
| 2 Singlet | UB3LYP/6-31G*                        | Opt.            | $C_2$     | -3215.4869918 | 2.00 1.99 1.96 1.86<br>1.37 / 0.63<br>0.14 0.04 0.01 0.00 |
| 2 Triplet | CAS(10,10)/STO-3G<br>//UB3LYP/6-31G* | Single<br>Point | $C_2$     | -3156.1202856 |                                                           |
| 2 Singlet | CAS(10,10)/STO-3G<br>//UB3LYP/6-31G* | Single<br>Point | $C_2$     | -3156.1113149 | 1.92 1.92 1.58 1.55<br>1.50 / 0.53<br>0.44 0.42 0.08 0.07 |
| 2 Singlet | B3LYP/6-31G*                         | Opt.            | $C_6$     | -3215.4820715 |                                                           |
| 2 Triplet | CAS(10,10)/STO-3G<br>//B3LYP/6-31G*  | Single<br>Point | $C_6$     | -3156.0926224 |                                                           |
| 2 Singlet | CAS(10,10)/STO-3G<br>//B3LYP/6-31G*  | Single<br>Point | $C_6$     | -3156.123765  | 1.94 1.90 1.86 1.80<br>1.79 / 0.25<br>0.19 0.14 0.08 0.07 |
| 2 Singlet | CAS(10,10)/6-31G*<br>//B3LYP/6-31G*  | Single<br>Point | $C_6$     | -3194.9702666 | 1.95 1.93 1.90 1.87<br>1.87 / 0.16<br>0.12 0.09 0.06 0.05 |
| 3 Singlet | B3LYP/6-31G*                         | Opt.            | $C_{10v}$ | -1910.827023  |                                                           |
| 3 Singlet | UB3LYP/6-31G*                        | Opt.            | $C_{10v}$ | -1910.8411170 | 1.98 1.98 1.86 1.86<br>1.29 / 0.71<br>0.14 0.14 0.02 0.02 |
| 3 Triplet | CAS(10,10)/STO-3G<br>//B3LYP/6-31G*  | Single<br>Point | $C_{10v}$ | -1875.4321369 |                                                           |
| 3 Singlet | CAS(10,10)/STO-3G<br>//B3LYP/6-31G*  | Single<br>Point | $C_{10v}$ | -1875.4466025 | 1.91 1.91 1.80 1.80<br>1.02 / 0.98<br>0.20 0.20 0.09 0.09 |
| 3 Singlet | CAS(10,10)/6-31G*<br>//B3LYP/6-31G*  | Single<br>Point | $C_{10v}$ | -1898.627727  | 1.92 1.92 1.84 1.84<br>1.36 / 0.64<br>0.16 0.16 0.08 0.08 |

**Figure ES15.** Comparison of  $\sigma_{zz}$  scans computed for **2** and **3** at the HF/6-311G\*\*, B972/6-31G\*\* and UB972/6-311G\*\* level. Lines are obtained from a fit with 3 ICLOCs with parameters given in Tables ES12 and ES13.

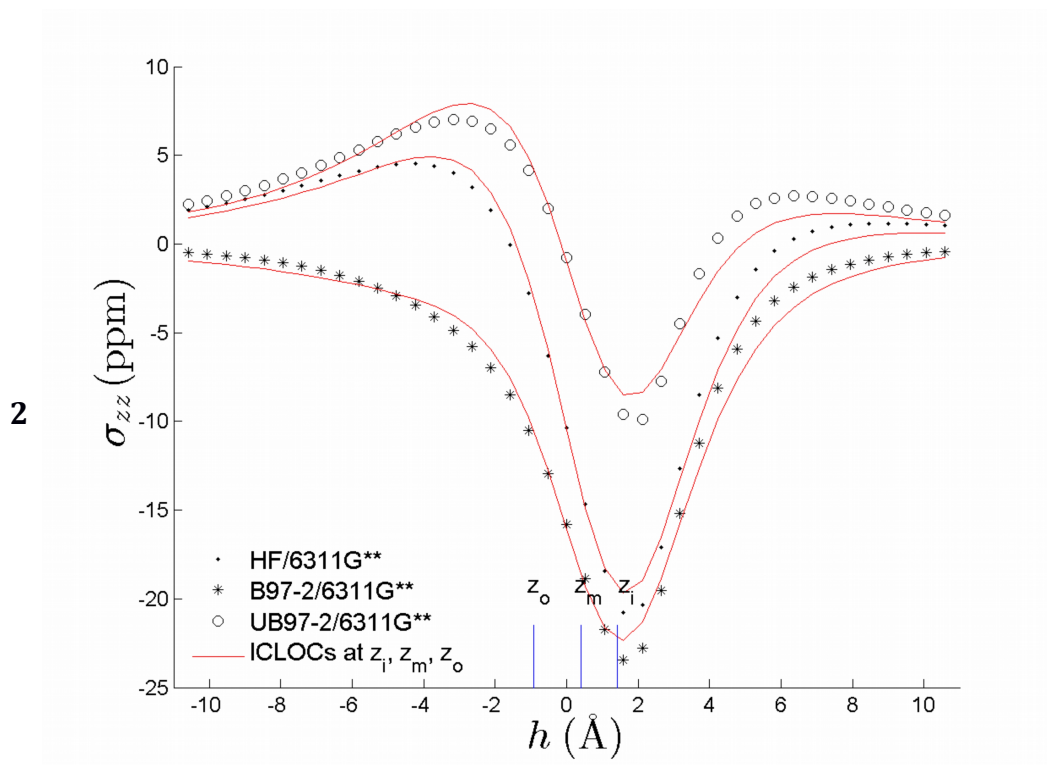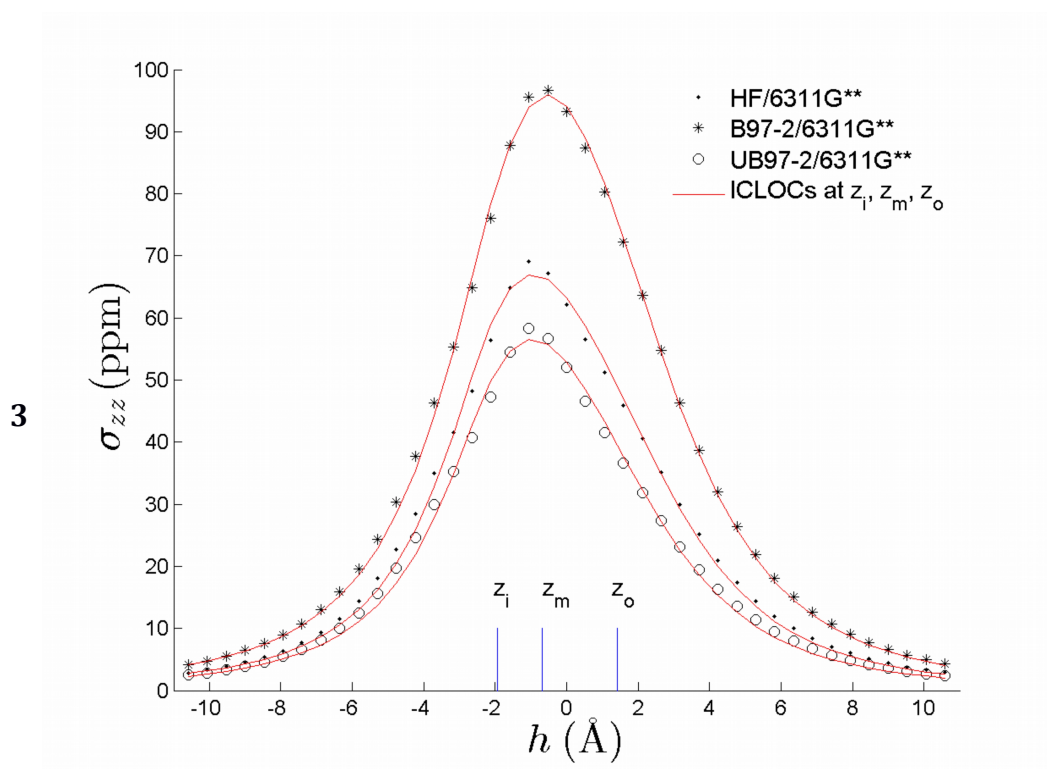

**Table ESI2.** Best-fit parameters of the 3 ICLOCs used in fitting the  $\sigma_{zz}$  scans for **2** displayed in Fig. ESI5. The scans have been computed, at the HF, B972 and UB972 level, using always the 6-311G\*\* basis set. Each ICLOC model is defined in terms of current strength  $I$ , ring radius  $s$ , and ring height  $z$  (see ref. 45). Calculated (non-relative) current strengths are averages of the appropriate bond current strengths from Fig. 5 of ref. 6. The heights  $z$  of the loops above the centre of mass along the symmetry axis, and the radii  $s$  of the loops have been determined geometrically and have not been fitted. Fitted values are expected to be significantly larger than calculated ring current strengths because the ring is affected by the 6 H atoms pointing inwards, which give a strong paramagnetic contribution to the chemical shielding.

| Loop   | $I$ (nA T <sup>-1</sup> ) |       |           |            | $s$ (Å) | $z$ (Å) |
|--------|---------------------------|-------|-----------|------------|---------|---------|
|        | HF scan                   | Calc. | B972 scan | UB972 scan |         |         |
| inner  | 22.6                      | 10.7  | 18.8      | 17.4       | 3.56    | 1.41    |
| middle | -16.2                     | -8.7  | -17.5     | -18.7      | 5.53    | 0.40    |
| outer  | -4.0                      | -1.4  | 10.7      | -3.0       | 7.17    | -0.93   |
| Total  | 2.4                       | 0.6   | 12.0      | -4.3       |         |         |

**Table ESI3.** Best-fit parameters of the 3 ICLOCs used in fitting the  $\sigma_{zz}$  scans for **3** displayed in Fig. ESI5. The scans have been computed, at the HF, B972 or UB972 level, using always the 6-311G\*\* basis set. Each ICLOC model is defined in terms of current strength  $I$ , ring radius  $s$ , and ring height  $z$  (see ref. 45). Calculated (non-relative) current strengths are from this paper (Table 1). The heights  $z$  of the loops above the centre of mass along the symmetry axis, and the radii  $s$  of the loops have been determined geometrically and have not been fitted.

| Loop   | $I$ (nA T <sup>-1</sup> ) |       |           |       | $s$ (Å) | $z$ (Å) |            |
|--------|---------------------------|-------|-----------|-------|---------|---------|------------|
|        | HF scan                   | Calc. | B972 Scan | Calc. |         |         | UB972 Scan |
| inner  | -6.3                      | -17.7 | -3.9      | -17.8 | -5.2    | 2.34    | -1.94      |
| middle | -25.2                     | -9.4  | -40.6     | -23.0 | -22.6   | 3.71    | -0.68      |
| outer  | -11.5                     | -13.1 | -18.5     | -25.1 | -7.5    | 4.07    | 1.42       |
| Total  | -43.0                     | -40.2 | -63.0     | -65.9 |         |         |            |

**B3LYP/6-31G\* optimized geometry of C<sub>6</sub> *altan*-kekulene (1 of 3 pages)**

|   |           |           |          |
|---|-----------|-----------|----------|
| 6 | 1.234525  | 3.616164  | 1.293861 |
| 6 | 2.514426  | 2.877232  | 1.293968 |
| 6 | -2.514428 | 2.877212  | 1.293861 |
| 6 | 3.748969  | -0.738941 | 1.293968 |
| 6 | -3.748952 | -0.738953 | 1.293861 |
| 6 | 1.234543  | -3.616173 | 1.293968 |
| 6 | -1.234543 | 3.616173  | 1.293968 |
| 6 | 3.748952  | 0.738953  | 1.293861 |
| 6 | -3.748969 | 0.738941  | 1.293968 |
| 6 | 2.514428  | -2.877212 | 1.293861 |
| 6 | -2.514426 | -2.877232 | 1.293968 |
| 6 | -1.234525 | -3.616164 | 1.293861 |
| 6 | 1.199570  | 4.914394  | 0.671057 |
| 6 | 3.656233  | 3.496078  | 0.671166 |
| 6 | -3.656205 | 3.496055  | 0.671057 |
| 6 | 4.855809  | -1.418352 | 0.671166 |
| 6 | 1.199575  | -4.914430 | 0.671166 |
| 6 | -1.199575 | 4.914430  | 0.671166 |
| 6 | 4.855775  | 1.418339  | 0.671057 |
| 6 | -4.855809 | 1.418352  | 0.671166 |
| 6 | 3.656205  | -3.496055 | 0.671057 |
| 6 | -1.199570 | -4.914394 | 0.671057 |
| 6 | 0.000000  | 3.031283  | 1.628226 |
| 6 | 2.625168  | 1.515642  | 1.628226 |
| 6 | -2.625168 | 1.515642  | 1.628226 |
| 6 | 2.625168  | -1.515642 | 1.628226 |
| 6 | -2.625168 | -1.515642 | 1.628226 |
| 6 | 0.000000  | -3.031283 | 1.628226 |
| 6 | 0.000000  | 5.559218  | 0.339107 |
| 6 | 4.814424  | 2.779610  | 0.339107 |
| 6 | -4.814425 | 2.779609  | 0.339107 |
| 6 | 4.814425  | -2.779609 | 0.339107 |
| 6 | 0.000000  | -5.559218 | 0.339107 |
| 6 | 2.369320  | 5.467922  | 0.147194 |
| 6 | 3.550749  | 4.785866  | 0.147239 |
| 6 | -3.550700 | 4.785852  | 0.147194 |
| 6 | 5.920056  | -0.682106 | 0.147239 |
| 6 | 2.369307  | -5.467972 | 0.147239 |
| 6 | -2.369307 | 5.467972  | 0.147239 |
| 6 | 5.920020  | 0.682070  | 0.147194 |
| 6 | -5.920056 | 0.682106  | 0.147239 |
| 6 | 3.550700  | -4.785852 | 0.147194 |
| 6 | -2.369320 | -5.467922 | 0.147194 |



**B3LYP/6-31G\* optimized geometry of C<sub>6</sub> *altan*-kekulene (2 of 3 pages)**

|   |           |           |           |
|---|-----------|-----------|-----------|
| 1 | 0.000079  | 2.035514  | 2.055951  |
| 1 | 1.762846  | 1.017688  | 2.055951  |
| 1 | -1.762767 | 1.017825  | 2.055951  |
| 1 | 1.762767  | -1.017825 | 2.055951  |
| 1 | -1.762846 | -1.017688 | 2.055951  |
| 1 | -0.000079 | -2.035514 | 2.055951  |
| 6 | -3.550749 | -4.785866 | 0.147239  |
| 6 | -5.920020 | -0.682070 | 0.147194  |
| 6 | -4.855775 | -1.418339 | 0.671057  |
| 6 | -4.814424 | -2.779610 | 0.339107  |
| 6 | -3.656233 | -3.496078 | 0.671166  |
| 6 | 5.822766  | 3.361792  | -0.563494 |
| 6 | 5.629779  | 4.679986  | -1.084804 |
| 1 | 6.356336  | 5.056231  | -1.803044 |
| 6 | 4.468791  | 5.414166  | -0.776195 |
| 6 | 3.790828  | 6.565937  | -1.308069 |
| 1 | 4.190512  | 7.258242  | -2.039240 |
| 6 | 2.454412  | 6.577143  | -0.776210 |
| 6 | 6.867839  | 2.535506  | -1.084815 |
| 1 | 7.556996  | 2.976555  | -1.803059 |
| 6 | 6.923178  | 1.162988  | -0.776210 |
| 6 | 7.581682  | 0.000015  | -1.308069 |
| 1 | 8.381078  | 0.000031  | -2.039240 |
| 6 | 6.923201  | -1.163003 | -0.776195 |
| 6 | -5.822766 | -3.361792 | -0.563494 |
| 6 | -5.629779 | -4.679986 | -1.084804 |
| 1 | -6.356336 | -5.056231 | -1.803044 |
| 6 | -4.468791 | -5.414166 | -0.776195 |
| 6 | -3.790828 | -6.565937 | -1.308069 |
| 1 | -4.190512 | -7.258242 | -2.039240 |
| 6 | -2.454412 | -6.577143 | -0.776210 |
| 6 | -6.867839 | -2.535506 | -1.084815 |
| 1 | -7.556996 | -2.976555 | -1.803059 |
| 6 | -6.923178 | -1.162988 | -0.776210 |
| 6 | -7.581682 | -0.000015 | -1.308069 |
| 1 | -8.381078 | -0.000031 | -2.039240 |
| 6 | -6.923201 | 1.163003  | -0.776195 |
| 6 | -6.867876 | 2.535539  | -1.084804 |
| 1 | -7.556992 | 2.976633  | -1.803044 |
| 6 | -5.822780 | 3.361767  | -0.563494 |
| 6 | 6.867876  | -2.535539 | -1.084804 |
| 1 | 7.556992  | -2.976633 | -1.803044 |
| 6 | 5.822780  | -3.361767 | -0.563494 |
| 6 | 1.238107  | 7.215476  | -1.084815 |
| 1 | 1.200726  | 8.032828  | -1.803059 |

**B3LYP/6-31G\* optimized geometry of  $C_6$  *altan*-kekulene (3 of 3 pages)**

|   |           |           |           |
|---|-----------|-----------|-----------|
| 6 | -0.000015 | 6.723559  | -0.563494 |
| 6 | -1.238107 | -7.215476 | -1.084815 |
| 1 | -1.200726 | -8.032828 | -1.803059 |
| 6 | 0.000015  | -6.723559 | -0.563494 |
| 6 | 5.629732  | -4.679971 | -1.084815 |
| 1 | 6.356270  | -5.056273 | -1.803059 |
| 6 | 4.468767  | -5.414154 | -0.776210 |
| 6 | 3.790854  | -6.565921 | -1.308069 |
| 1 | 4.190566  | -7.258211 | -2.039240 |
| 6 | 2.454410  | -6.577170 | -0.776195 |
| 6 | 1.238097  | -7.215525 | -1.084804 |
| 1 | 1.200656  | -8.032864 | -1.803044 |
| 6 | -1.238097 | 7.215525  | -1.084804 |
| 1 | -1.200656 | 8.032864  | -1.803044 |
| 6 | -2.454410 | 6.577170  | -0.776195 |
| 6 | -3.790854 | 6.565921  | -1.308069 |
| 1 | -4.190566 | 7.258211  | -2.039240 |
| 6 | -4.468767 | 5.414154  | -0.776210 |
| 6 | -5.629732 | 4.679971  | -1.084815 |
| 1 | -6.356270 | 5.056273  | -1.803059 |

**UB3LYP/6-31G\* optimized geometry of  $C_2$  *altan*-kekulene (1 of 3 pages)**

|   |           |           |          |
|---|-----------|-----------|----------|
| 6 | 2.510668  | -2.881226 | 1.278430 |
| 6 | 1.233573  | -3.617669 | 1.280664 |
| 6 | 3.738406  | 0.738757  | 1.272307 |
| 6 | -2.510613 | -2.881245 | 1.278491 |
| 6 | 1.233493  | 3.617673  | 1.280686 |
| 6 | -3.738406 | 0.738705  | 1.272272 |
| 6 | 3.738406  | -0.738705 | 1.272272 |
| 6 | -1.233493 | -3.617673 | 1.280686 |
| 6 | 2.510613  | 2.881245  | 1.278491 |
| 6 | -3.738406 | -0.738757 | 1.272307 |
| 6 | -1.233573 | 3.617669  | 1.280664 |
| 6 | -2.510668 | 2.881226  | 1.278430 |
| 6 | 3.653315  | -3.503430 | 0.661655 |
| 6 | 1.199102  | -4.922888 | 0.663419 |
| 6 | 4.846789  | 1.419587  | 0.650140 |
| 6 | -3.653264 | -3.503476 | 0.661760 |
| 6 | -4.846791 | 1.419514  | 0.650062 |
| 6 | 4.846791  | -1.419514 | 0.650062 |
| 6 | -1.199010 | -4.922890 | 0.663442 |
| 6 | 3.653264  | 3.503476  | 0.661760 |
| 6 | -4.846789 | -1.419587 | 0.650140 |
| 6 | -3.653315 | 3.503430  | 0.661655 |
| 6 | 2.618420  | -1.515771 | 1.606950 |
| 6 | 0.000040  | -3.032202 | 1.615601 |
| 6 | 2.618411  | 1.515803  | 1.607030 |
| 6 | -2.618411 | -1.515803 | 1.607030 |
| 6 | -0.000040 | 3.032202  | 1.615601 |
| 6 | -2.618420 | 1.515771  | 1.606950 |
| 6 | 4.811595  | -2.786440 | 0.323432 |
| 6 | 0.000045  | -5.571531 | 0.336041 |
| 6 | 4.811590  | 2.786535  | 0.323574 |
| 6 | -4.811590 | -2.786535 | 0.323574 |
| 6 | -4.811595 | 2.786440  | 0.323432 |
| 6 | 3.551973  | -4.795562 | 0.147571 |
| 6 | 2.367697  | -5.479276 | 0.147894 |
| 6 | 5.906623  | 0.687007  | 0.125823 |
| 6 | -3.551914 | -4.795610 | 0.147693 |
| 6 | -5.906614 | 0.686901  | 0.125768 |
| 6 | 5.906614  | -0.686901 | 0.125768 |
| 6 | -2.367612 | -5.479298 | 0.147965 |
| 6 | 3.551914  | 4.795610  | 0.147693 |
| 6 | -5.906623 | -0.687007 | 0.125823 |
| 6 | -3.551973 | 4.795562  | 0.147571 |
| 1 | 1.754174  | -1.018732 | 2.031699 |
| 1 | 0.000045  | -2.035867 | 2.041486 |

**UB3LYP/6-31G\* optimized geometry of  $C_2$  *altan*-kekulene (2 of 3 pages)**

|   |           |           |           |
|---|-----------|-----------|-----------|
| 1 | 1.754224  | 1.018746  | 2.031885  |
| 1 | -1.754224 | -1.018746 | 2.031885  |
| 1 | -0.000045 | 2.035867  | 2.041486  |
| 1 | -1.754174 | 1.018732  | 2.031699  |
| 6 | -2.367697 | 5.479276  | 0.147894  |
| 6 | 2.367612  | 5.479298  | 0.147965  |
| 6 | 1.199010  | 4.922890  | 0.663442  |
| 6 | -0.000045 | 5.571531  | 0.336041  |
| 6 | -1.199102 | 4.922888  | 0.663419  |
| 6 | 0.000038  | -6.748918 | -0.549567 |
| 6 | 1.241037  | -7.247432 | -1.057860 |
| 1 | 1.206945  | -8.076332 | -1.762697 |
| 6 | 2.456761  | -6.601684 | -0.758122 |
| 6 | 3.796267  | -6.595440 | -1.279290 |
| 1 | 4.200673  | -7.294801 | -2.001134 |
| 6 | 4.474780  | -5.430988 | -0.760581 |
| 6 | -1.240993 | -7.247490 | -1.057764 |
| 1 | -1.206915 | -8.076402 | -1.762586 |
| 6 | -2.456697 | -6.601757 | -0.757973 |
| 6 | -3.796258 | -6.595574 | -1.279042 |
| 1 | -4.200703 | -7.294983 | -2.000817 |
| 6 | -4.474779 | -5.431105 | -0.760327 |
| 6 | -0.000038 | 6.748918  | -0.549567 |
| 6 | -1.241037 | 7.247432  | -1.057860 |
| 1 | -1.206945 | 8.076332  | -1.762697 |
| 6 | -2.456761 | 6.601684  | -0.758122 |
| 6 | -3.796267 | 6.595440  | -1.279290 |
| 1 | -4.200673 | 7.294801  | -2.001134 |
| 6 | -4.474780 | 5.430988  | -0.760581 |
| 6 | 1.240993  | 7.247490  | -1.057764 |
| 1 | 1.206915  | 8.076402  | -1.762586 |
| 6 | 2.456697  | 6.601757  | -0.757973 |
| 6 | 3.796258  | 6.595574  | -1.279042 |
| 1 | 4.200703  | 7.294983  | -2.000817 |
| 6 | 4.474779  | 5.431105  | -0.760327 |
| 6 | 5.636006  | 4.700683  | -1.068815 |
| 1 | 6.367827  | 5.083336  | -1.777936 |
| 6 | 5.823731  | 3.373157  | -0.562778 |
| 6 | -5.636006 | -4.700683 | -1.068815 |
| 1 | -6.367827 | -5.083336 | -1.777936 |
| 6 | -5.823731 | -3.373157 | -0.562778 |
| 6 | 5.635960  | -4.700501 | -1.069116 |
| 1 | 6.367745  | -5.083096 | -1.778307 |
| 6 | 5.823702  | -3.373011 | -0.563017 |
| 6 | -5.635960 | 4.700501  | -1.069116 |

**UB3LYP/6-31G\* optimized geometry of  $C_2$  *altan*-kekulene (3 of 3 pages)**

|   |           |           |           |
|---|-----------|-----------|-----------|
| 1 | -6.367745 | 5.083096  | -1.778307 |
| 6 | -5.823702 | 3.373011  | -0.563017 |
| 6 | -6.875640 | -2.544059 | -1.074929 |
| 1 | -7.576605 | -2.985946 | -1.780545 |
| 6 | -6.919751 | -1.172928 | -0.771830 |
| 6 | -7.588797 | -0.000088 | -1.291760 |
| 1 | -8.397545 | -0.000115 | -2.012982 |
| 6 | -6.919722 | 1.172770  | -0.771948 |
| 6 | -6.875583 | 2.543881  | -1.075155 |
| 1 | -7.576516 | 2.985719  | -1.780831 |
| 6 | 6.875583  | -2.543881 | -1.075155 |
| 1 | 7.576516  | -2.985719 | -1.780831 |
| 6 | 6.919722  | -1.172770 | -0.771948 |
| 6 | 7.588797  | 0.000088  | -1.291760 |
| 1 | 8.397545  | 0.000115  | -2.012982 |
| 6 | 6.919751  | 1.172928  | -0.771830 |
| 6 | 6.875640  | 2.544059  | -1.074929 |
| 1 | 7.576605  | 2.985946  | -1.780545 |

**B3LYP/6-31G\* optimized geometry of  $C_{10v}$  *altan*<sub>2</sub>-[10]annulene (1 of 2 pages)**

|   |           |           |           |
|---|-----------|-----------|-----------|
| 6 | 0.722636  | 2.224046  | -1.939032 |
| 6 | -0.722636 | 2.224046  | -1.939032 |
| 6 | -1.891886 | 1.374536  | -1.939032 |
| 6 | -2.338500 | 0.000000  | -1.939032 |
| 6 | -1.891886 | -1.374536 | -1.939032 |
| 6 | -0.722636 | -2.224046 | -1.939032 |
| 6 | 0.722636  | -2.224046 | -1.939032 |
| 6 | 1.891886  | -1.374536 | -1.939032 |
| 6 | 2.338500  | 0.000000  | -1.939032 |
| 6 | 1.891886  | 1.374536  | -1.939032 |
| 6 | 1.091757  | 3.360083  | -1.016032 |
| 6 | -1.091757 | 3.360083  | -1.016032 |
| 6 | -2.858257 | 2.076645  | -1.016032 |
| 6 | -3.533000 | 0.000000  | -1.016032 |
| 6 | -2.858257 | -2.076645 | -1.016032 |
| 6 | -1.091757 | -3.360083 | -1.016032 |
| 6 | 1.091757  | -3.360083 | -1.016032 |
| 6 | 2.858257  | -2.076645 | -1.016032 |
| 6 | 3.533000  | 0.000000  | -1.016032 |
| 6 | 2.858257  | 2.076645  | -1.016032 |
| 6 | 0.000000  | 3.885500  | -0.356032 |
| 6 | -2.283840 | 3.143436  | -0.356032 |
| 6 | -3.695330 | 1.200686  | -0.356032 |
| 6 | -3.695330 | -1.200686 | -0.356032 |
| 6 | -2.283840 | -3.143436 | -0.356032 |
| 6 | 0.000000  | -3.885500 | -0.356032 |
| 6 | 2.283840  | -3.143436 | -0.356032 |
| 6 | 3.695330  | -1.200686 | -0.356032 |
| 6 | 3.695330  | 1.200686  | -0.356032 |
| 6 | 2.283840  | 3.143436  | -0.356032 |
| 6 | 0.000000  | 4.063500  | 1.086968  |
| 6 | -2.388465 | 3.287441  | 1.086968  |
| 6 | -3.864618 | 1.255691  | 1.086968  |
| 6 | -3.864618 | -1.255691 | 1.086968  |
| 6 | -2.388465 | -3.287441 | 1.086968  |
| 6 | 0.000000  | -4.063500 | 1.086968  |
| 6 | 2.388465  | -3.287441 | 1.086968  |
| 6 | 3.864618  | -1.255691 | 1.086968  |
| 6 | 3.864618  | 1.255691  | 1.086968  |
| 6 | 2.388465  | 3.287441  | 1.086968  |
| 6 | 1.254300  | 3.860338  | 1.750968  |
| 6 | -1.254300 | 3.860338  | 1.750968  |
| 6 | -3.283800 | 2.385820  | 1.750968  |
| 6 | -4.059000 | 0.000000  | 1.750968  |

**B3LYP/6-31G\* optimized geometry of  $C_{10v}$  *altan*<sub>2</sub>-[10]annulene (2 of 2 pages)**

|   |           |           |          |
|---|-----------|-----------|----------|
| 6 | -3.283800 | -2.385820 | 1.750968 |
| 6 | -1.254300 | -3.860338 | 1.750968 |
| 6 | 1.254300  | -3.860338 | 1.750968 |
| 6 | 3.283800  | -2.385820 | 1.750968 |
| 6 | 4.059000  | 0.000000  | 1.750968 |
| 6 | 3.283800  | 2.385820  | 1.750968 |
| 1 | 1.252909  | 3.856059  | 2.838968 |
| 1 | -1.252909 | 3.856059  | 2.838968 |
| 1 | -3.280160 | 2.383175  | 2.838968 |
| 1 | -4.054500 | 0.000000  | 2.838968 |
| 1 | -3.280160 | -2.383175 | 2.838968 |
| 1 | -1.252909 | -3.856059 | 2.838968 |
| 1 | 1.252909  | -3.856059 | 2.838968 |
| 1 | 3.280160  | -2.383175 | 2.838968 |
| 1 | 4.054500  | 0.000000  | 2.838968 |
| 1 | 3.280160  | 2.383175  | 2.838968 |
